# Supplementary material for: Metagenomic Analysis of Bacteria, Fungi, Bacteriophages, and Helminths in the Gut of Giant Pandas
Source: PubMed Central journal article supplement (PMC6080571; doi:10.3389/fmicb.2018.01717), 2018-07-31
Supplement: Image_15.pdf [file Image_15.pdf]

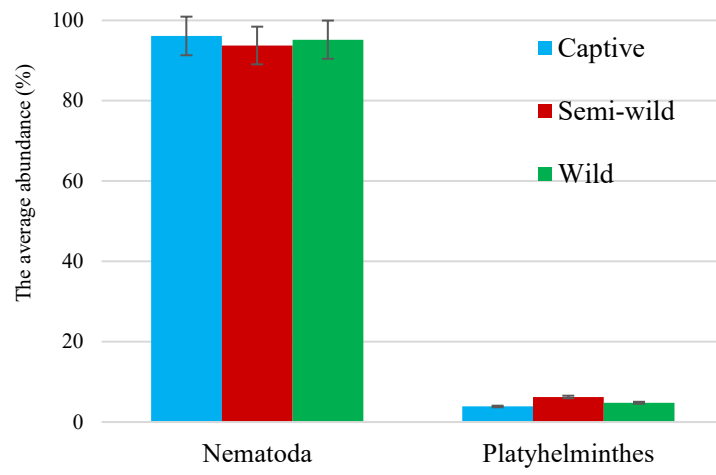

Figure S15 Average abundance of helminths between the three groups at phylum level
